# Supplementary material for: Antibiotic Susceptibility Profiles of Lactic Acid Bacteria from the Human Vagina and Genetic Basis of Acquired Resistances
Source: PubMed Central journal article supplement (PMC7178285; doi:10.3390/ijms21072594), 2020-04-08
Supplement: ijms-21-02594-s001.pdf [file ijms-21-02594-s001.pdf]

**Supplementary Table 1.-** Primers and PCR conditions for amplifying selected antibiotic resistance genes used in this study.

| Resistance gene                   | Primers | Sequence (5' – 3')         | <i>T<sub>m</sub></i> (°C) | Amplicon size (bp) | Reference                   |
|-----------------------------------|---------|----------------------------|---------------------------|--------------------|-----------------------------|
| RPP <sup>a</sup>                  | DI      | GAYACNCCNGGNCA YRTNGAYTT   | 50                        | 1,083              | (Clermont et al., 1997)     |
|                                   | DII     | GCCCARWANGGRTTNGGNGGNACYTC |                           |                    |                             |
| RPP                               | Tet-1   | GCTCACGTTGACGCAGGAA        | 50                        | 1,300              | (Barbosa et al., 1999)      |
|                                   | Tet-2   | AGGATTTGGCGGGACTTCTA       |                           |                    |                             |
| <i>tet</i> (M)                    | DI      | GAYCANCCNGGNCA YRTNGAYTT   | 55                        | 1,513              | (Gevers et al., 2003)       |
|                                   | tetM_R  | CACCGAGCAGGGATTTCTCCAC     |                           |                    |                             |
| <i>tet</i> (O)                    | tetO_F  | AATGAAGATTCCGACAATTT       | 45                        | 781                | (Gevers et al., 2003)       |
|                                   | tetO_R  | CTCATGCGTTGTAGTATTCCA      |                           |                    |                             |
| <i>tet</i> (S)                    | tetS_F  | ATCAAGATATTAAGGAC          | 45                        | 573                | (Gevers et al., 2003)       |
|                                   | tetS_R  | TTCTCTATGTGGTAATC          |                           |                    |                             |
| <i>tet</i> (W)                    | tetWF   | AAGCGGCAGTCACTTCCTTCC      | 50                        | 1,200              | (Scott et al., 2000)        |
|                                   | Tet-2   | AGGATTTGGCGGSACTTCTA       |                           |                    |                             |
| <i>tet</i> (K)                    | tetK_F  | TTATGGTGGTTGTAGCTAGAAA     | 45                        | 348                | (Gevers et al., 2003)       |
|                                   | tetK_R  | AAAGGGTTAGAACTCTTGAAA      |                           |                    |                             |
| <i>tet</i> (L)                    | tetL_F  | GTMGTTGCGCGCTATATTCC       | 45                        | 696                | (Gevers et al., 2003)       |
|                                   | tetL_R  | GTGAAMGRWAGCCCACCTAA       |                           |                    |                             |
| <i>erm</i> (A)                    | ermA_F  | TCTAAAAAGCATGTAAAAGAA      | 48                        | 645                | (Rizzotti et al., 2005)     |
|                                   | ermA_R  | CTTCGATAGTTTATTAATATTAGT   |                           |                    |                             |
| <i>erm</i> (B)                    | ermB_F  | GAAAAGGTA CTCAACCAAATA     | 50                        | 639                | (Rizzotti et al., 2005)     |
|                                   | ermB_R  | AGTAACGGTACTTAAATTGTTTAC   |                           |                    |                             |
| <i>erm</i> (C)                    | ermC_F  | TCAAAACATAATATAGATAAA      | 43                        | 642                | (Rizzotti et al., 2005)     |
|                                   | ermC_R  | GCTAATATTGTTTAAATCGTCAAT   |                           |                    |                             |
| <i>erm</i> (F)                    | ermF_F  | CGGGTCAGCACTTTACTATTG      | 50                        | 466                | (Roberts et al., 1999)      |
|                                   | ermF_R  | GGACCTACCTCATAGACAAG       |                           |                    |                             |
| <i>mef</i> (A)                    | mefA_F  | ACCGATTCTATCAGCAAAG        | 43                        | 940                | (Luna et al., 2000)         |
|                                   | mefA_R  | GGACCTGCCATTGGTGTG         |                           |                    |                             |
| <i>cat</i>                        | cat_F   | ATGACTTTTAATATTATRAWTT     | 49                        | 648                | (Hummel et al., 2007a)      |
|                                   | cat_R   | TCATYTACMYTATSAATTATAT     |                           |                    |                             |
| <i>bla</i>                        | bla_F   | CATARTTCCGATAATASMGCC      | 51                        | 297                | (Hummel et al., 2007b)      |
|                                   | bla_R   | CGTSTTTAACTAAGTATSGY       |                           |                    |                             |
| <i>aac</i> (6')- <i>aph</i> (2'') | aac_F   | CCAAGAGCAATAAGGGCATA       | 60                        | 220                | (Rojo-Bezares et al., 2006) |
|                                   | aac_R   | CACTATCATAACCACTACCG       |                           |                    |                             |
| <i>aad</i> (E)                    | aadE_F  | GCAGAACAGGATGAACGTATTCCG   | 55                        | 369                | (Klare et al., 2007)        |
|                                   | aadE_R  | ATCAGTCGGA ACTATGTCCC      |                           |                    |                             |
| <i>vanA</i>                       | vanA_F  | TCACCCCTTTAACGCTAATAC      | 50                        | 1,006              | This study                  |
|                                   | vanA_R  | GTTTGGGGTTGCTCAGACC        |                           |                    |                             |

<sup>a</sup>RPP, genes encoding ribosomal protecting proteins.

## Reference

- Barbosa, T.M., Scott, K.P., and Flint, H.J. (1999). Evidence for recent intergeneric transfer of a new tetracycline resistance gene, *tet(W)*, isolated from *Butyrivibrio fibrisolvens*, and the occurrence of *tet(O)* in ruminal bacteria. *Environ Microbiol* 1(1), 53-64. doi: 10.1046/j.1462-2920.1999.00004.x.
- Clermont, D., Chesneau, O., De Cespédès, G., and Horaud, T. (1997). New tetracycline resistance determinants coding for ribosomal protection in streptococci and nucleotide sequence of *tet(T)* isolated from *Streptococcus pyogenes* A498. *Antimicrob Agents Chemother* 41(1), 112-116.
- Gevers, D., Danielsen, M., Huys, G., and Swings, J. (2003). Molecular characterization of *tet(M)* genes in *Lactobacillus* isolates from different types of fermented dry sausage. *Appl Environ Microbiol* 69(2), 1270-1275. doi: 10.1128/aem.69.2.1270-1275.2003.
- Hummel, A., Holzapfel, W.H., and Franz, C.M. (2007a). Characterisation and transfer of antibiotic resistance genes from enterococci isolated from food. *Syst Appl Microbiol* 30(1), 1-7. doi: 10.1016/j.syapm.2006.02.004.
- Hummel, A.S., Hertel, C., Holzapfel, W.H., and Franz, C.M. (2007b). Antibiotic resistances of starter and probiotic strains of lactic acid bacteria. *Appl Environ Microbiol* 73(3), 730-739. doi: 10.1128/AEM.02105-06.
- Klare, I., Konstabel, C., Werner, G., Huys, G., Vankerckhoven, V., Kahlmeter, G., Hildebrandt, B., Müller-Bertling, S., Witte, W., and Goossens, H. (2007). Antimicrobial susceptibilities of *Lactobacillus*, *Pediococcus* and *Lactococcus* human isolates and cultures intended for probiotic or nutritional use. *J Antimicrob Chemother* 59(5), 900-912. doi: 10.1093/jac/dkm035.
- Luna, V.A., Cousin, S., Jr., Whittington, W.L., and Roberts, M.C. (2000). Identification of the conjugative *mef* gene in clinical *Acinetobacter junii* and *Neisseria gonorrhoeae* isolates. *Antimicrob Agents Chemother* 44(9), 2503-2506. doi: 10.1128/aac.44.9.2503-2506.2000.
- Rizzotti, L., Simeoni, D., Cocconcelli, P., Gazzola, S., Dellaglio, F., and Torriani, S. (2005). Contribution of enterococci to the spread of antibiotic resistance in the production chain of swine meat commodities. *J Food Prot* 68(5), 955-965. doi: 10.4315/0362-028x-68.5.955.
- Roberts, M.C., Chung, W.O., Roe, D., Xia, M., Marquez, C., Borthagaray, G., Whittington, W.L., and Holmes, K.K. (1999). Erythromycin-resistant *Neisseria gonorrhoeae* and oral commensal *Neisseria* spp. carry known rRNA methylase genes. *Antimicrob Agents Chemother* 43(6), 1367-1372.
- Rojo-Bezares, B., Sáenz, Y., Poeta, P., Zarazaga, M., Ruiz-Larrea, F., and Torres, C. (2006). Assessment of antibiotic susceptibility within lactic acid bacteria strains isolated from wine. *Int J Food Microbiol* 111(3), 234-240. doi: 10.1016/j.ijfoodmicro.2006.06.007.
- Scott, K.P., Melville, C.M., Barbosa, T.M., and Flint, H.J. (2000). Occurrence of the new tetracycline resistance gene *tet(W)* in bacteria from the human gut. *Antimicrob Agents Chemother* 44(3), 775-777. doi: 10.1128/aac.44.3.775-777.2000.

1 **Supplementary Table 2.-** General data of the genome sequencing projects of vaginal LAB strains resistant to antibiotics isolated  
 2 from human.

| <b>Species</b>       | <b>Strain</b> | <b>Antibiotic resistance</b>                                            | <b>Assembly condition</b> | <b>N° contigs</b> | <b>Total bases</b> | <b>Contig Max</b> | <b>N50</b> | <b>N90</b> |
|----------------------|---------------|-------------------------------------------------------------------------|---------------------------|-------------------|--------------------|-------------------|------------|------------|
| <i>L. crispatus</i>  | VA50-4AN      | Kanamycin, ampicillin, and trimethoprim resistant                       | Spades (t145)             | 300               | 2,215,244          | 131,661           | 25,648     | 6,043      |
| <i>L. salivarius</i> | VA40-10       | Gentamicin, kanamycin, streptomycin, neomycin, and vancomycin resistant | Spades (t149)             | 89                | 1,984,518          | 253,118           | 76,265     | 27,714     |
| <i>L. jensenii</i>   | VA04-2AN      | Trimethoprim resistant                                                  | Spades (t145)             | 83                | 1,681,921          | 145,175           | 56,675     | 19,479     |
| <i>L. paracasei</i>  | VA02-1AN      | Chloramphenicol and vancomycin resistant                                | Spades (t145)             | 135               | 3,044,979          | 434,877           | 111,561    | 25,204     |
| <i>L. reuteri</i>    | VA24-5        | Vancomycin and trimethoprim resistant                                   | Spades (t145)             | 94                | 2,179,946          | 238,354           | 128,326    | 26,629     |
| <i>B. bifidum</i>    | VA07-1AN      | Streptomycin resistant                                                  | Spades (t145)             | 17                | 2,162,084          | 467,960           | 212,216    | 76,748     |

3

4

5 **Supplementary Table 3.-** General features of the genomes of seven antibiotic resistant LAB strains sequenced in this work.

| Feature/gene(s) coding for                                | <i>L. crispatus</i><br>VA50-4AN | <i>L. jensenii</i><br>VA04-2AN | <i>L. paracasei</i><br>VA02-1AN | <i>L. reuteri</i> VA24-5 | <i>L. salivarius</i><br>VA40-10 | <i>B. bifidum</i><br>VA07-1AN |
|-----------------------------------------------------------|---------------------------------|--------------------------------|---------------------------------|--------------------------|---------------------------------|-------------------------------|
| Size (bp)                                                 | 2,215,244                       | 1,681,921                      | 3,044,979                       | 2,179,946                | 1,984,518                       | 2,162,084                     |
| GC content                                                | 36.7                            | 34.3                           | 46.2                            | 38.8                     | 32.8                            | 62.6                          |
| No. of coding sequences                                   | 2,444                           | 1,594                          | 3,219                           | 2,188                    | 1,984                           | 1,839                         |
| No. subsystems in RAST                                    | 193                             | 182                            | 238                             | 226                      | 215                             | 200                           |
| Resistance to antibiotic and toxic compounds <sup>a</sup> | 19                              | 9                              | 17                              | 24                       | 32                              | 23                            |
| Penicillin binding proteins                               | 9 (8 class C, 1 class A)        | 1 (class C)                    | 7 (6 class C, 1 class A)        | 2 (class C)              | 1 (class C)                     | 1 (class A)                   |
| D-ala-D-ala dipeptide ligase                              | 1 type Y                        | 1 type Y                       | 1 type F                        | 1 type F                 | 1 type F                        | 1 (?)                         |
| Antibiotic resistance                                     | n.d.                            | n.d.                           | n.d.                            | n.d.                     | n.d.                            | <i>tet(W)</i><br>pseudogene   |
| rRNAs                                                     | 16S+5S+23S                      | 16S+5S+23S                     | 16S+5S+23S                      | 16S+5S+23S               | 16S+5S+23S                      | 16S+5S+23S                    |
| No. of RNAs                                               | 72                              | 61                             | 62                              | 75                       | 71                              | 57                            |
| Transposases/integrases/excisionases                      | 38                              | 6                              | 29                              | 16                       | 7                               | 12                            |
| Phage-related proteins                                    | 38                              | 10                             | 59                              | 22                       | 34                              | 4                             |
| Competence-associated proteins                            | 14                              | 16                             | 12                              | 19                       | 12                              | 3                             |
| CRISPR-associated loci                                    | 2                               | 2                              | 2                               | 2                        | 2                               | -                             |
| Bacteriocins-like substances                              | n.d.                            | n.d.                           | Colicin V                       | Colicin V                | n.d.                            | n.d.                          |
| Toxins                                                    | Doc toxin, Protein J            | Doc toxin, Toxin HigB          | Exfoliative toxin A, Protein J  | Toxin HigB, Protein J    | Protein J                       | Protein J                     |

6 <sup>a</sup>RAST category “Virulence, Disease and Defense”, subcategory “Resistance to Antibiotic and Toxic Compounds”.

7 n.d., not detected

8

9 **Supplementary Table 4.-** Analysis of the open reading frames (ORFs) and other features identified around the silent *tet(W)* gene from the  
 10 streptomycin-resistant *B. bifidum* VA07-1AN.  
 11

| ORF    | 5' end | 3' end <sup>a</sup> | % GC content | No. of aa <sup>b</sup> | Known protein with the highest homology (microorganism) <sup>c</sup>                             | Identity length/total length (% aa identity) | GenBank accession no. |
|--------|--------|---------------------|--------------|------------------------|--------------------------------------------------------------------------------------------------|----------------------------------------------|-----------------------|
| ORF1   | 651    | 1,796               | 54.1         | 381                    | Hypothetical protein ( <i>Bifidobacterium longum</i> )                                           | 378/381 (99%)                                | WP_013140927.1        |
| ORF2   | 1,898  | 2,110               | 55.9         | 70                     | Hypothetical protein ( <i>B. longum</i> subsp. <i>longum</i> )                                   | 70/82 (100%)                                 | ADH00692.1            |
| ORF3   | 2,153  | 2,629               | 54.3         | 158                    | PcfB family protein ( <i>B. longum</i> )                                                         | 158/158 (100%)                               | WP_013140929.1        |
| ORF4   | 2,626  | 4,431               | 54.7         | 601                    | Type IV secretory system conjugative DNA transfer family protein ( <i>B. longum</i> )            | 601/601 (100%)                               | WP_117845844.1        |
| ORF5   | 4,460  | 4,687               | 53.9         | 75                     | Hypothetical protein (Terrabacteria group)                                                       | 75/75 (100%)                                 | WP_006060453.1        |
| ORF6'  | 5,564  | 6,433               | 53.1         | 289                    | Truncated tetracycline resistance protein ( <i>B. longum</i> )                                   | 288/289 (99%)                                | ACD97481.1            |
| ORF6'' | 6,406  | 7,485               | 53.5         | 359                    | Truncated tetracycline resistance ribosomal protection protein Tet(W) ( <i>Actinomyces</i> spp.) | 358/639 (99%)                                | WP_034502607.1        |
| ORF7   | 7,536  | 8,894               | 51.7         | 452                    | MFS transporter ( <i>Bifidobacterium bifidum</i> )                                               | 424/425 (99%)                                | WP_117405967.1        |
| ORF8   | 11,384 | 8,895               | 60.9         | 829                    | Esterase-like activity of phytase family protein ( <i>B. bifidum</i> )                           | 824/829 (99%)                                | WP_057081546.1        |
| ORF9   | 12,829 | 11,630              | 63.3         | 399                    | Elongation factor Tu ( <i>B. bifidum</i> )                                                       | 399/399 (100%)                               | WP_003815489.1        |
| ORF10  | 15,132 | 13,003              | 62.6         | 709                    | Elongation factor G ( <i>B. bifidum</i> )                                                        | 709/709 (100%)                               | WP_003813832.1        |
| ORF11  | 15,630 | 15,160              | 62.8         | 156                    | 30S ribosomal protein S7 ( <i>Bifidobacterium</i> )                                              | 156/156 (100%)                               | WP_003813834.1        |
| ORF12  | 16,007 | 15,636              | 62.4         | 123                    | 30S ribosomal protein S12 ( <i>Bifidobacterium</i> )                                             | 123/123(100%)                                | WP_003815498.1        |
| ORF13  | 17,224 | 18,249              | 65.0         | 341                    | Aminotransferase class I/II-fold pyridoxal phosphate-dependent enzyme ( <i>B. bifidum</i> )      | 341/341(100%)                                | WP_013363697.1        |
| ORF14  | 19,464 | 18,274              | 63.1         | 396                    | Glycosyltransferase ( <i>B. bifidum</i> )                                                        | 396/396 (100%)                               | WP_003815502.1        |
| ORF15  | 23,656 | 19,802              | 65.8         | 1,284                  | Hypothetical protein ( <i>B. bifidum</i> )                                                       | 1,280/1,289 (99%)                            | WP_074740964.1        |
| ORF16  | 23,919 | 25,199              | 70.8         | 426                    | Formate-dependent phosphoribosyl-glycinamide formyltransferase ( <i>B. bifidum</i> )             | 426/426 (100%)                               | WP_022173870.1        |
| ORF17  | 25,517 | 26,269              | 61.9         | 250                    | Phosphoribosyl-aminoimidazole-succino-carboxamide synthase ( <i>B. bifidum</i> )                 | 250/250 (100%)                               | WP_003813894.1        |
| ORF18  | 26,477 | 30,223              | 65.7         | 1,248                  | Phosphoribosyl-formyl-glycinamide synthase ( <i>B. bifidum</i> )                                 | 1,246/1,248 (99%)                            | WP_057081549.1        |
| ORF19  | 30,992 | 30,330              | 56.4         | 220                    | Hypothetical protein ( <i>B. bifidum</i> )                                                       | 218/220 (99%)                                | WP_061085919.1        |
| ORF20  | 31,731 | 31,093              | 50.1         | 212                    | DUF4230 domain-containing protein ( <i>B. bifidum</i> )                                          | 212/212 (100%)                               | WP_003821830.1        |
| ORF21  | 32,109 | 32,930              | 61.3         | 273                    | Hypothetical protein BBNG_01261 ( <i>B. bifidum</i> )                                            | 273/273 (100%)                               | EFR50713.1            |
| ORF22  | 32,990 | 33,202              | 58.7         | 70                     | LysR family transcriptional regulator ( <i>B. bifidum</i> )                                      | 70/70 (100%)                                 | WP_013363704.1        |
| ORF23  | 33,883 | 33,506              | 65.1         | 125                    | VOC family protein ( <i>B. bifidum</i> )                                                         | 125/125 (100%)                               | WP_013363705.1        |
| ORF24  | 34,194 | 33,976              | 63.9         | 72                     | Hypothetical protein ( <i>B. bifidum</i> )                                                       | 72/72 (100%)                                 | WP_047284518.1        |
| ORF25  | 35,828 | 34,239              | 62.5         | 529                    | Type VI secretion protein ImpB ( <i>B. bifidum</i> )                                             | 526/529 (99%)                                | WP_065434215.1        |
| ORF26  | 36,010 | 37,518              | 63.9         | 502                    | Amidophosphoribosyl-transferase ( <i>B. bifidum</i> )                                            | 501/502 (99%)                                | WP_003813913.1        |
| ORF27  | 37,591 | 38,628              | 65.0         | 345                    | Phosphoribosyl-formyl-glycinamide cyclo-ligase ( <i>B. bifidum</i> )                             | 345/345 (100%)                               | WP_003813914.1        |
| ORF28  | 38,757 | 40,022              | 64.6         | 421                    | Phosphoribosylamine-glycine ligase ( <i>B. bifidum</i> )                                         | 421/421 (100%)                               | WP_014760478.1        |

12 <sup>a</sup>Including start and stop codons.

13 <sup>b</sup>aa, amino acids.

14 <sup>c</sup>Color code of the different open reading frames (ORFs): Purple, antibiotic resistance genes; yellow, integrase-, mobilization- and conjugation-associated genes; pale blue,  
 15 genes encoding transcription regulators; white, genes involved in other processes.

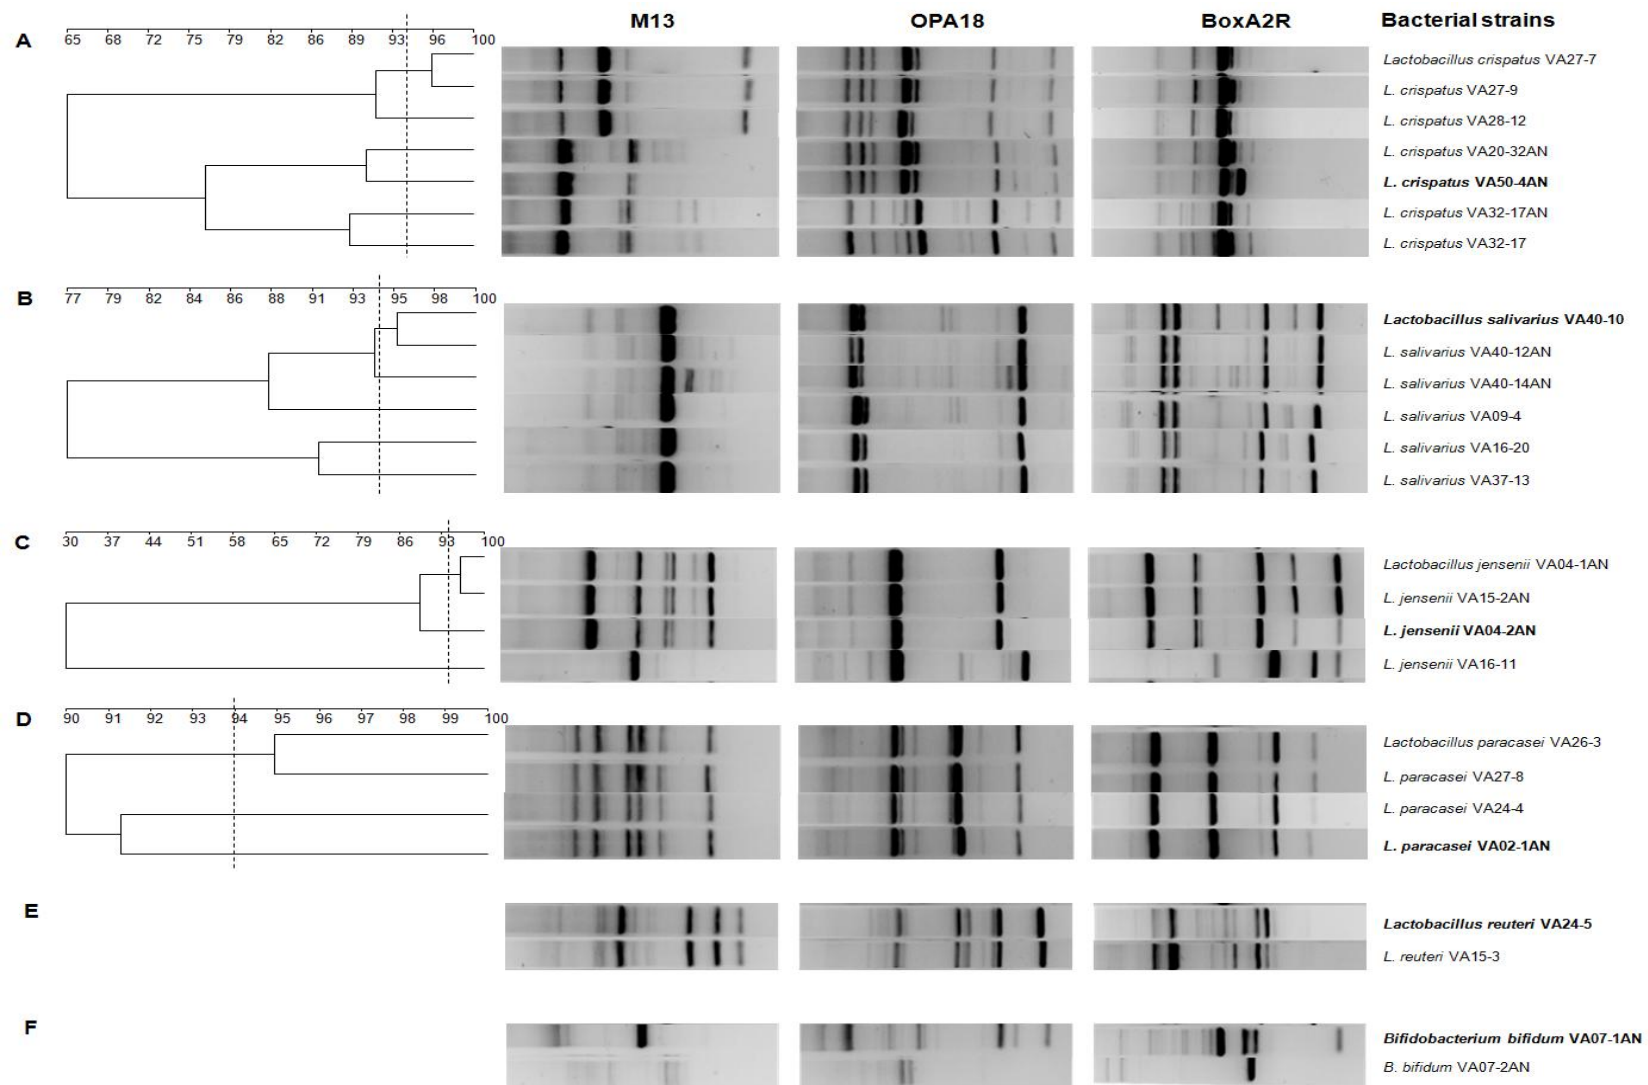

**Supplementary Figure 1.-** Different rep-PCR and RAPD typing profiles of the LAB strains, obtained with primers M13, OPA18 and BoxA2R, and dendrogram of similarity of the combined typing profiles expressed by the Simple Matching (SM) coefficient of the different strains of this study. Key of the panels: A, strains of *Lactobacillus crispatus*; B, strains of *Lactobacillus salivarius*; C, strains of *Lactobacillus jensenii*; D, strains of *Lactobacillus paracasei*; E, strains of *Lactobacillus reuteri*; and F, strains of *Bifidobacterium bifidum*. Clustering of the profiles was performed by the unweighted pair group method using arithmetic averages (UPGMA). The vertical dotted line indicates 94% correlation (minimum level of reproducibility) as discriminatory at the strain level. The strains shown in bold were selected for subsequent genome sequencing.
